# Supplementary material for: Oxylipins as Biomarkers for Aromatase Inhibitor-Induced Arthralgia (AIA) in Breast Cancer Patients
Source: MDPI journal article supplement (doi:10.3390/metabo13030452), 2023-03-20
Supplement: s1 [file s1]

| Supplemental Table S1. Polyunsaturated Fatty Acid (PUFA) levels across time (ng/mL plasma), mean $\pm$ SD                                                                                                                 |                           |                           |                           |                       |
|---------------------------------------------------------------------------------------------------------------------------------------------------------------------------------------------------------------------------|---------------------------|---------------------------|---------------------------|-----------------------|
| PUFA                                                                                                                                                                                                                      | Baseline<br><i>n</i> = 25 | 3 months<br><i>n</i> = 22 | 6 months<br><i>n</i> = 24 | <i>P</i> <sup>a</sup> |
| Arachidonic acid (ARA)                                                                                                                                                                                                    | 524.3 $\pm$ 498.3         | 430.2 $\pm$ 210.0         | 452.7 $\pm$ 232.0         | 0.529                 |
| Linoleic acid (LA)                                                                                                                                                                                                        | 2,300 $\pm$ 2,300         | 2,300 $\pm$ 1,800         | 2,400 $\pm$ 2,200         | 0.538                 |
| Eicosapentaenoic acid (EPA)                                                                                                                                                                                               | 220.4 $\pm$ 300.3         | 178.6 $\pm$ 245.3         | 155.6 $\pm$ 155.7         | 0.894                 |
| Docosahexaenoic acid (DHA)                                                                                                                                                                                                | 4.5 $\pm$ 6.6             | 4.2 $\pm$ 5.6             | 4.1 $\pm$ 5.4             | 0.938                 |
| <sup>a</sup> Mixed-effects model of log-transformed PUFA level, with time (date) as a continuous variable, adjusted for batch and baseline oxylipin level, clustered on patient (no adjustments for multiple comparisons) |                           |                           |                           |                       |

| Supplemental Table S2. Oxylipin levels across time (pg/mL plasma), mean $\pm$ SD |      |         |                           |                           |                           |                       |
|----------------------------------------------------------------------------------|------|---------|---------------------------|---------------------------|---------------------------|-----------------------|
| Oxylipin                                                                         | PUFA | Pathway | Baseline<br><i>n</i> = 25 | 3 months<br><i>n</i> = 22 | 6 months<br><i>n</i> = 24 | <i>P</i> <sup>a</sup> |
| PGD <sub>2</sub>                                                                 | ARA  | COX-2   | 5.4 $\pm$ 4.8             | 6.0 $\pm$ 5.6             | 5.8 $\pm$ 5.5             | 0.294                 |
| 11-HETE                                                                          | ARA  | LOX     | 55.6 $\pm$ 45.6           | 59.3 $\pm$ 35.6           | 54.9 $\pm$ 43.7           | 0.787                 |
| 12-HETE                                                                          | ARA  | 12-LOX  | 237.7 $\pm$ 316.7         | 253.0 $\pm$ 309.3         | 482.8 $\pm$ 1,253         | 0.568                 |
| 12-oxo-EETE                                                                      | ARA  | LOX     | 108.3 $\pm$ 94.1          | 141.7 $\pm$ 118.2         | 128.3 $\pm$ 106.1         | 0.536                 |
| 5-HETE                                                                           | ARA  | 5-LOX   | 103.3 $\pm$ 136.7         | 116.4 $\pm$ 103.1         | 100.6 $\pm$ 82.0          | 0.460                 |
| 8-HETE                                                                           | ARA  | 15-LOX  | 10.2 $\pm$ 5.9            | 12.1 $\pm$ 7.8            | 12.3 $\pm$ 9.8            | 0.684                 |
| 15-HETE                                                                          | ARA  | 15-LOX  | 115.3 $\pm$ 72.0          | 123.9 $\pm$ 66.8          | 149.2 $\pm$ 122.2         | 0.238                 |
| 20HETE                                                                           | ARA  | CYP450  | 80.5 $\pm$ 50.0           | 81.5 $\pm$ 39.2           | 103.7 $\pm$ 96.9          | 0.076                 |
| 5(6)-EET                                                                         | ARA  | CYP450  | 1,053 $\pm$ 1,354         | 2,096 $\pm$ 2,855         | 1,796 $\pm$ 2,526         | 0.105                 |
| 8(9)-EET                                                                         | ARA  | CYP450  | 679.8 $\pm$ 1,041         | 1,311 $\pm$ 2,216         | 1,147 $\pm$ 1,913         | 0.472                 |
| 11(12)-EET                                                                       | ARA  | CYP450  | 797.9 $\pm$ 798.4         | 1,356 $\pm$ 1,815         | 1,353 $\pm$ 1,794         | 0.070                 |
| 14(15)-EET                                                                       | ARA  | CYP450  | 2,102 $\pm$ 2,646         | 3,922 $\pm$ 5,195         | 3,696 $\pm$ 4,768         | 0.058                 |
| 5(6)-DiHET                                                                       | ARA  | sEH     | 25.3 $\pm$ 16.6           | 21.8 $\pm$ 10.9           | 30.2 $\pm$ 43.4           | 0.773                 |
| 8(9)-DiHET                                                                       | ARA  | sEH     | 58.1 $\pm$ 64.4           | 58.4 $\pm$ 86.2           | 62.7 $\pm$ 71.7           | 0.850                 |
| 11(12)-DiHET                                                                     | ARA  | sEH     | 116.3 $\pm$ 86.9          | 115.8 $\pm$ 66.9          | 140.8 $\pm$ 122.2         | 0.229                 |
| 14(15)-DiHET                                                                     | ARA  | sEH     | 94.9 $\pm$ 74.8           | 104.2 $\pm$ 60.3          | 136.9 $\pm$ 199.2         | 0.126                 |
| 9-HODE                                                                           | LA   | LOX     | 1,539 $\pm$ 2,063         | 1,761 $\pm$ 2,438         | 1,534 $\pm$ 1,801         | 0.795                 |
| 13-HODE                                                                          | LA   | LOX     | 2,018 $\pm$ 2,440         | 2,180 $\pm$ 2,876         | 2,073 $\pm$ 2,267         | 0.776                 |
| 13(S)-HOTrE                                                                      | LA   | 15-LOX  | 141.8 $\pm$ 127.6         | 126.6 $\pm$ 87.6          | 106.4 $\pm$ 66.3          | 0.297                 |
| 9-OxoODE                                                                         | LA   | 15-LOX  | 113.9 $\pm$ 91.1          | 142.0 $\pm$ 98.9          | 136.2 $\pm$ 134.9         | 0.942                 |
| 13-OxoODE                                                                        | LA   | LOX     | 245.0 $\pm$ 345.2         | 914.8 $\pm$ 2,331         | 286.6 $\pm$ 521.7         | 0.963                 |
| 9(10)-EpOME                                                                      | LA   | CYP450  | 24,719 $\pm$ 46,172       | 36,935 $\pm$ 60,993       | 43,689 $\pm$ 73,959       | 0.072                 |
| 12(13)-EpOME                                                                     | LA   | CYP450  | 17,522 $\pm$ 31,024       | 24,794 $\pm$ 36,137       | 32,565 $\pm$ 54,680       | 0.069                 |
| 9(10)-DiHOME                                                                     | LA   | sEH     | 1,031 $\pm$ 1,543         | 1,297 $\pm$ 2,010         | 1,336 $\pm$ 1,497         | 0.068                 |
| 12(13)-DiHOME                                                                    | LA   | sEH     | 1,458 $\pm$ 2,167         | 2,012 $\pm$ 2,858         | 1,851 $\pm$ 2,722         | 0.125                 |
| 9-HOTrE                                                                          | ALA  | 5-LOX   | 60.8 $\pm$ 41.6           | 62.1 $\pm$ 35.0           | 51.8 $\pm$ 34.9           | 0.500                 |
| 7(8)-EpDPA                                                                       | DHA  | CYP450  | 572.9 $\pm$ 757.3         | 821.9 $\pm$ 1,225         | 940.8 $\pm$ 1,360         | 0.066                 |
| 10(11)-EpDPA                                                                     | DHA  | CYP450  | 266.2 $\pm$ 506.8         | 464.8 $\pm$ 728.5         | 466.7 $\pm$ 859.7         | 0.441                 |
| 13(14)-EpDPA                                                                     | DHA  | CYP450  | 219.7 $\pm$ 364.1         | 470.3 $\pm$ 808.5         | 369.8 $\pm$ 706.7         | 0.100                 |
| 16(17)-EpDPA                                                                     | DHA  | CYP450  | 366.6 $\pm$ 617.5         | 386.7 $\pm$ 535.6         | 377.6 $\pm$ 653.3         | 0.616                 |
| 19(20)-EpDPA                                                                     | DHA  | CYP450  | 1,005 $\pm$ 1,917         | 1,073 $\pm$ 1,602         | 1,534 $\pm$ 2,404         | 0.108                 |
| 19(20)-DiHDPA                                                                    | DHA  | sEH     | 316.7 $\pm$ 243.8         | 348.8 $\pm$ 238.5         | 466.2 $\pm$ 707.4         | 0.163                 |
| 5-HEPE                                                                           | EPA  | 5-LOX   | 25.5 $\pm$ 27.7           | 31.3 $\pm$ 32.4           | 27.1 $\pm$ 21.2           | 0.581                 |
| 8-HEPE                                                                           | EPA  | LOX     | 11.7 $\pm$ 18.5           | 13.8 $\pm$ 20.4           | 9.3 $\pm$ 5.7             | 0.827                 |
| 12-HEPE                                                                          | EPA  | 12-LOX  | 23.3 $\pm$ 68.5           | 17.2 $\pm$ 39.7           | 65.3 $\pm$ 173.5          | 0.173                 |
| 15-HEPE                                                                          | EPA  | 15-LOX  | 9.4 $\pm$ 8.8             | 9.0 $\pm$ 7.7             | 8.4 $\pm$ 9.5             | 0.386                 |
| 8(9)-EpETE                                                                       | EPA  | CYP450  | 15.8 $\pm$ 19.3           | 49.2 $\pm$ 131.0          | 33.8 $\pm$ 57.4           | <b>0.039</b>          |
| 14(15)-EpETE                                                                     | EPA  | CYP450  | 47.2 $\pm$ 60.4           | 160.9 $\pm$ 399.6         | 98.3 $\pm$ 191.9          | 0.083                 |
| 17(18)-EpETE                                                                     | EPA  | CYP450  | 70.4 $\pm$ 70.4           | 250.6 $\pm$ 593.1         | 159.2 $\pm$ 325.0         | 0.111                 |
| 5(15)-DiHETE                                                                     | EPA  | sEH     | 7.3 $\pm$ 14.3            | 20.8 $\pm$ 59.1           | 7.7 $\pm$ 17.4            | 0.953                 |
| 8(15)-DiHETE                                                                     | EPA  | sEH     | 9.0 $\pm$ 21.8            | 10.8 $\pm$ 19.6           | 15.6 $\pm$ 20.6           | <b>0.025</b>          |
| 14(15)-DiHETE                                                                    | EPA  | sEH     | 6.9 $\pm$ 5.9             | 5.8 $\pm$ 4.1             | 6.9 $\pm$ 6.9             | 0.766                 |
| 17(18)-DiHETE                                                                    | EPA  | sEH     | 88.3 $\pm$ 78.3           | 88.5 $\pm$ 71.6           | 90.7 $\pm$ 72.1           | 0.852                 |

<sup>a</sup> Mixed-effects model of log-transformed oxylipin level, with time (date) as a continuous variable, adjusted for batch and baseline oxylipin level, clustered on patient (no adjustments for multiple comparisons)  
Abbreviations - ARA: Arachidonic Acid; LA: Linoleic Acid; ALA: Alpha Linolenic Acid; DHA: Docosahexaenoic acid; EPA: Eicosapentaenoic acid; COX: Cyclooxygenase; LOX: Lipoxxygenase; CYP450: Cytochrome P450; sEH: soluble epoxide hydrolase
